# Supplementary material
Source: PubMed Central journal article supplement (PMC9261313)
Supplement: Table1.pdf [file Table1.pdf]

**Table 1.  $\beta$ -OHB studies in animals and humans**

|                       | <b>Subjects</b>                                       | <b>Therapies</b>                                                                                      | <b>Outcomes</b>                                                                                                                                                                                   | <b>Reference</b>       |
|-----------------------|-------------------------------------------------------|-------------------------------------------------------------------------------------------------------|---------------------------------------------------------------------------------------------------------------------------------------------------------------------------------------------------|------------------------|
| <b>Animal studies</b> |                                                       |                                                                                                       |                                                                                                                                                                                                   |                        |
| <b>Beneficial</b>     | Rats undergoing 20 min ischemia and 3 hr reperfusion  | Fasting to increase $\beta$ -OHB levels to $15.58 \pm 2.56$ mM/g                                      | Fasting induced high levels of $\beta$ -OHB reduced infarct size, total number of premature ventricular complexes and duration of ventricular tachycardia, and improved mitochondrial redox state | (Snorek et al., 2012)  |
|                       | Rats undergoing 30 min ischemia and 2 hr reperfusion  | Fed/fasted $\pm$ $\beta$ -OHB with 25 $\mu$ M/kg/min, IV                                              | High concentrations of $\beta$ -OHB reduced infarct size and apoptosis induced by I/R injury                                                                                                      | (Zou et al., 2002)     |
|                       | Mice undergoing 30 min ischemia and 24 hr reperfusion | Delivery of $\beta$ -OHB by 1.6 mM/kg/24 hr, SQ                                                       | $\beta$ -OHB reduced infarct size, attenuated apoptosis and preserved cardiac function and improved mitochondrial function                                                                        | (Yu et al., 2018)      |
|                       | Dogs with progressive heart failure                   | Continuous intravascular $\beta$ -OHB infusion, from 2.5 $\mu$ M/kg/min to 5 $\mu$ M/kg/min           | $\beta$ -OHB infusion preserved systolic function and ameliorated pathologic cardiac remodeling                                                                                                   | (Horton et al., 2019)  |
|                       | TAC/MI mice and post-MI remodeling rats               | Ketone Ester diet increased ketone levels to $1.1 \pm 0.2$ mM/L in mice or $1.8 \pm 0.2$ mM/L in rats | Chronic oral supplement of Ketone Ester prevented and treated heart failure with attenuated                                                                                                       | (Yurista et al., 2021) |

|                    |                                                                                                       |                                                                            |                                                                                                                                  |                               |
|--------------------|-------------------------------------------------------------------------------------------------------|----------------------------------------------------------------------------|----------------------------------------------------------------------------------------------------------------------------------|-------------------------------|
|                    |                                                                                                       |                                                                            | development of left ventricular dysfunction and remodeling                                                                       |                               |
|                    | Six and 24-month-old rats                                                                             | Fasting for 3 days or $\beta$ -OHB 200 mg/kg/d IP                          | Starvation decreased ER stress and inflammasome formation, $\beta$ -OHB treatment increased the expression of MnSOD and catalase | (Bae et al., 2016)            |
|                    | Muscle-specific SCOT knockout mice                                                                    | Fasting of SCOT knockout mice increased $\beta$ -OHB                       | Elevation in $\beta$ -OHB attenuated TAC-induced inflammation and macrophage infiltration                                        | (Byrne et al., 2020)          |
|                    | HFpEF mice by combining the age, long-term high-fat diet, and desoxycorticosterone pivalate challenge | 1 mg/g/day Ketone ester diet or 10 $\mu$ g/g/day Empagliflozin for 30 days | Increased $\beta$ -OHB level attenuated Nlrp3 inflammasome formation and mitochondrial dysfunction and fibrosis                  | (Deng et al., 2021)           |
|                    | Cardiomyocytes isolated from young (2.5 months), aged (2.5 years) and aged HF rabbits                 | 2mM $\beta$ -OHB treated for 24 hr                                         | Elevated $\beta$ -OHB levels can benefit mitochondrial repair in the aging heart                                                 | (Thai et al., 2019)           |
| <b>Detrimental</b> | Isolated adult rat cardiomyocytes                                                                     | 5 mM $\beta$ -OHB treat for 1, 4, or 16 hr                                 | Prolonged exposure to $\beta$ -OHB altered glucose uptake and increased ROS production                                           | (Pelletier and Coderre, 2007) |
|                    | Rats                                                                                                  | Ketogenic diet or $\beta$ -OHB injection 100 mg/kg, Qod for 16 weeks       | A ketogenic diet inhibits mitochondrial biogenesis and induces atrial fibrosis                                                   | (Xu et al., 2021)             |

| <b>Human studies</b> |                                                              |                                                                                                  |                                                                                                                    |                           |
|----------------------|--------------------------------------------------------------|--------------------------------------------------------------------------------------------------|--------------------------------------------------------------------------------------------------------------------|---------------------------|
| <b>Beneficial</b>    | Normal volunteers                                            | 1.6/3.2 mM/kg<br>Ketone Esters<br>drinks<br>increased<br>ketone levels<br>to $2.8 \pm 0.2$<br>mM | $\beta$ -OHB reduced<br>blood glucose, free<br>fatty acids, and<br>triglyceride levels                             | (Stubbs et al.,<br>2017)  |
|                      | Normal volunteers                                            | 1.9 kcal/kg<br>Ketone Esters<br>increased<br>ketone levels<br>to 3.3 mM                          | $\beta$ -OHB lowered<br>plasma insulin,<br>ghrelin, glucagon-<br>like peptide-1, and<br>peptide tyrosine<br>levels | (Stubbs et al.,<br>2018)  |
|                      | Chronic HFrEF<br>patients                                    | $\beta$ -OHB<br>infusion 0.18<br>g/kg/h for 3 hr                                                 | $\beta$ -OHB improved<br>hemodynamics in<br>HFrEF patients<br>with increased CO,<br>LVEF and MVO <sub>2</sub>      | (Nielsen et al.,<br>2019) |
|                      | Type 2 diabetic<br>patients with high<br>cardiovascular risk | Empagliflozin<br>or glimepiride<br>for 30 days                                                   | Empagliflozin<br>increased $\beta$ -OHB<br>level and<br>attenuated Nlrp3<br>inflammasome<br>activation             | (Kim et al.,<br>2020)     |

$\beta$ -OHB:  $\beta$ -hydroxybutyrate, I/R: ischemia/reperfusion, ROS: reactive oxygen species, TAC/MI: transverse aortic constriction/myocardial infarction, IV: intravenous infusion, SQ: subcutaneous infusion, IP: intraperitoneal injection, ER: endoplasmic reticulum, MnSOD: manganese superoxide dismutase, CO: cardiac output, LVEF: left ventricular ejection fraction, MVO<sub>2</sub>: myocardial oxygen consumption
